# Supplementary material
Source: publisher figshare collection journal article supplement (https://plos.figshare.com/articles/dataset/_/1325017)
Supplement: Supplementary file 1 [file 1]

## Sheet: US_Food_Stamps_data
	Clean US food stamps
1988M10	18446735
1988M11	18434600
1988M12	18709788
1989M01	18814591
1989M02	18805348
1989M03	19188889
1989M04	19036458
1989M05	18858178
1989M06	18856665
1989M07	18696508
1989M08	18784944
1989M09	19044857
1989M10	19523488
1989M11	19256464
1989M12	19461401
1990M01	19848748
1990M02	19958037
1990M03	20414960
1990M04	20370671
1990M05	20290045
1990M06	20382828
1990M07	20320763
1990M08	20301533
1990M09	20458793
1990M10	20928991
1990M11	21294125
1990M12	21686672
1991M01	21980958
1991M02	22496484
1991M03	22945164
1991M04	23207931
1991M05	23148421
1991M06	23247989
1991M07	23215673
1991M08	23663074
1991M09	23680042
1991M10	24055568
1991M11	24437847
1991M12	24854461
1992M01	25102189
1992M02	25385468
1992M03	25722405
1992M04	25875570
1992M05	25694638
1992M06	25748466
1992M07	25698933
1992M08	25862454
1992M09	26445826
1992M10	26223472
1992M11	26393793
1992M12	26627009
1993M01	26857336
1993M02	26918029
1993M03	27386320
1993M04	27366950
1993M05	27272406
1993M06	27195390
1993M07	27288566
1993M08	27215012
1993M09	27097011
1993M10	27207775
1993M11	27343082
1993M12	27446313
1994M01	27687318
1994M02	27843411
1994M03	27969969
1994M04	27718861
1994M05	27520328
1994M06	27384252
1994M07	27313426
1994M08	27216765
1994M09	26980548
1994M10	27064638
1994M11	26891997
1994M12	27112215
1995M01	27066207
1995M02	26766762
1995M03	27101343
1995M04	26707357
1995M05	26458491
1995M06	26325055
1995M07	26042197
1995M08	25995326
1995M09	25893686
1995M10	26015906
1995M11	25855401
1995M12	25880962
1996M01	25899749
1996M02	2.58177e+07
1996M03	25885340
1996M04	25643720
1996M05	25556902
1996M06	25183399
1996M07	24968781
1996M08	24932297
1996M09	2.47465e+07
1996M10	24400846
1996M11	24139445
1996M12	23920683
1997M01	23694285
1997M02	23475445
1997M03	2.31674e+07
1997M04	2.27132e+07
1997M05	22413208
1997M06	22140575
1997M07	21680584
1997M08	21544651
1997M09	20991727
1997M10	20799556
1997M11	20607139
1997M12	20517163
1998M01	2.03527e+07
1998M02	20047459
1998M03	2.00348e+07
1998M04	1.97078e+07
1998M05	1.94937e+07
1998M06	19289319
1998M07	19029374
1998M08	18910497
1998M09	18678190
1998M10	18781505
1998M11	1.86478e+07
1998M12	18617087
1999M01	1.8483e+07
1999M02	18278318
1999M03	18354465
1999M04	18100816
1999M05	1.79393e+07
1999M06	17833509
1999M07	17723939
1999M08	17694898
1999M09	1.75175e+07
1999M10	1.75259e+07
1999M11	17538216
1999M12	17445538
2000M01	17323336
2000M02	17190438
2000M03	17285182
2000M04	17040733
2000M05	17018465
2000M06	17045814
2000M07	16895039
2000M08	17004601
2000M09	17013325
2000M10	17061834
2000M11	17092424
2000M12	17175724
2001M01	17159349
2001M02	16954558
2001M03	17249899
2001M04	17139964
2001M05	17243514
2001M06	17457195
2001M07	17531585
2001M08	17758492
2001M09	17858172
2001M10	1.81767e+07
2001M11	18499920
2001M12	18745920
2002M01	18918120
2002M02	1.8951e+07
2002M03	19216647
2002M04	19166625
2002M05	1.93086e+07
2002M06	19311119
2002M07	1.92805e+07
2002M08	19686984
2002M09	19784894
2002M10	20058407
2002M11	20329597
2002M12	20552847
2003M01	20707436
2003M02	20745659
2003M03	21015436
2003M04	21257856
2003M05	21540799
2003M06	2.17726e+07
2003M07	22023384
2003M08	22321897
2003M09	22631507
2003M10	2.279e+07
2003M11	22985002
2003M12	23280083
2004M01	23489099
2004M02	23516588
2004M03	23802229
2004M04	23876422
2004M05	2.39751e+07
2004M06	24163352
2004M07	2.44028e+07
2004M08	24612736
2004M09	24900591
2004M10	24802748
2004M11	25151903
2004M12	25490954
2005M01	25435283
2005M02	25271669
2005M03	25437821
2005M04	2.53618e+07
2005M05	25408363
2005M06	2.55312e+07
2005M07	25552255
2005M08	25765535
2005M09	2.60221e+07
2005M10	2.624e+07
2005M11	2.63041e+07
2005M12	26830254
2006M01	26512607
2006M02	26205436
2006M03	26322900
2006M04	26015715
2006M05	26019397
2006M06	26078530
2006M07	25996308
2006M08	26135466
2006M09	26196843
2006M10	26288401
2006M11	26295881
2006M12	26390332
2007M01	26367366
2007M02	26153209
2007M03	26375165
2007M04	26281533
2007M05	26408378
2007M06	26609472
2007M07	26615790
2007M08	26903523
2007M09	2.68956e+07
2007M10	26978915
2007M11	27153716
2007M12	27353661
2008M01	27580355
2008M02	27546523
2008M03	27765663
2008M04	27967749
2008M05	28240681
2008M06	28449404
2008M07	28862959
2008M08	29258947
2008M09	29588572
2008M10	30656370
2008M11	30884729
2008M12	31567037
2009M01	31983716
2009M02	32332423
2009M03	32928433
2009M04	33523897
2009M05	34171518
2009M06	34882031
2009M07	35602939
2009M08	36241857
2009M09	36918948
2009M10	37672818
2009M11	38183998
2009M12	38978986
2010M01	39430990
2010M02	39588798
2010M03	40120061
2010M04	40426682
2010M05	40799767
2010M06	41275457
2010M07	41830271
2010M08	42389614
2010M09	42795314
2010M10	43168583
2010M11	43596084
2010M12	44082361
2011M01	44187874
2011M02	44199479
2011M03	44587275
2011M04	44610238
2011M05	45173618
